## **Measles Virus Genotype A in Canada's Capital Region Wastewater Associated with Public Health Vaccination Initiatives**

Emma Tomalty, Élisabeth Mercier, Lakshmi Pisharody, Tram Nguyen, Xin Tian, Md Pervez Kabir, Chandler Wong, Felix Addo, Nada Hegazy, Elizabeth Renouf, Shen Wan, Robert Delatolla\*

\*Corresponding Author:

Dr. Robert Delatolla

Professor

Work E-mail: [robert.delatolla@uottawa.ca](mailto:robert.delatolla@uottawa.ca)

### **Abstract**

The recent global resurgence of measles in 2023-2024, despite its preventability through vaccination, is a significant public health concern largely driven by decreased vaccination coverage during the SARS-CoV-2 pandemic. To address this resurgence and to restore vaccine coverage disrupted by the pandemic, Ottawa Public Health intensified vaccination efforts in 2023 and 2024. Additionally, a research initiative began in April 2024 to monitor Ottawa wastewater for measles virus (MeV) using established wastewater and environmental surveillance (WES) protocols. Given the absence of active measles cases in the Ottawa region, unexpected positive MeV detections through RT-qPCR prompted genotypic analysis as well as retrospective analysis of archived RNA samples dating back to 2020. The genotypic analysis identified positive detection to belong to genotype A, the progenitor strain of the viral vaccines, marking the first report of MeV RNA and MeV vaccine shedding in North American wastewater. Positive detections in both real-time and retrospectively analysed samples coincided with the increased vaccination efforts by Ottawa Public Health. These findings emphasize the importance of integrating genotypic analysis into WES practices to mitigate possible confounding factors, such as vaccine shedding into wastewater. Additionally, this research highlights the potential application of MeV WES for monitoring community immunization efforts in real time. Implementing the findings of this study for MeV WES, as well as for other re-emerging viruses, will enhance the accuracy of public health response and optimize resource allocation.

## 1. Introduction

Measles, a viral infection primarily affecting children, results from an infection by the measles virus (MeV) of the *Morbillivirus* genus<sup>1</sup>. According to the World Health Organization (WHO), wildtype measles can be found classified into 24 genotypes distributed across 8 clades (A-H), with 3 genotypes (B3, D8, and H1) currently circulating globally and all vaccine strains belonging to genotype A<sup>2-4</sup>. The WHO framework for verifying endemic measles elimination emphasizes the necessity of genotyping clinically confirmed measles cases to distinguish between measles illness from a circulating wildtype strain and a vaccine-associated illness, enabling the tracking of transmission pathways<sup>5</sup>.

Despite the high contagiousness of measles infections, measles is preventable through vaccination, necessitating widespread immunity (>95%) to halt transmission. In Canada, the vaccines for measles/mumps/rubella/varicella (MMR & MMR-Var) are included in routine childhood immunization programs<sup>6</sup>. However, during the pandemic, disruptions in vaccination schedules led to a concerning surge in infections. In 2022, compared to the previous year, there was an 18% rise in estimated measles cases and a 43% increase in measles-related deaths globally<sup>2,3,7</sup>. While Canada maintains no ongoing transmission of MeV, the risk persists due to incoming travelers from regions where the virus is prevalent. Consequently, susceptible populations, such as under-immunized communities or individuals with fading immunity, remain vulnerable to introduced infections<sup>8</sup>.

For over a decade, wastewater and environmental surveillance (WES) has been used to monitor community transmission and infection rates of non-enveloped viruses spread via the fecal-oral route, such as poliovirus, hepatitis virus, and norovirus<sup>9,10</sup>. During the SARS-CoV-2 pandemic, the full potential of WES was realized and is now used worldwide to track various respiratory viruses, including SARS-CoV-2, influenza A, influenza B, and respiratory syncytial virus. MeV, another respiratory virus, is reported to be primarily detected in the urine of infected individuals, enabling its detection in wastewater<sup>11,12</sup>. Recent studies have demonstrated the use of WES as an unbiased surveillance method for MeV through detection of wildtype strains in wastewater during measles outbreaks in affected communities<sup>13-15</sup>.

Following the global increase in measles cases post-pandemic, Ottawa Public Health intensified its vaccination efforts in 2023 and 2024 to restore vaccine coverage lost during the pandemic years of 2020 to 2022. To complement these efforts and address rising concerns about measles, a research initiative was launched for measles surveillance in wastewater, utilizing established WES systems used for monitoring respiratory viruses. The detection of an unexpected MeV signal in Ottawa's wastewater, concerning due to the absence of known active measles cases in the city, prompted a genotypic investigation to identify the specific strains present. Analysis revealed that the detected MeV was not wildtype but rather vaccine type, marking it the first report of MeV RNA and MeV vaccine shedding in North American wastewater and second report of MeV vaccine shedding in the world <sup>15</sup>. This study highlights the critical insight of MeV vaccine shedding into wastewater as a confounding factor and underscores the necessity of genotyping within WES practices to distinguish between vaccine type and wildtype viruses. By ensuring accurate differentiation, public health responses can be appropriately guided, avoiding misinterpretations and enabling precise actions based on the actual measles activity in the community.

## 2. **Materials and Methods**

### 2.1 *Wastewater Sampling, Sample Nucleic Acid Extraction, and RT-qPCR Analysis*

Twenty-four-hour composite primary clarified sludge samples were collected from the City of Ottawa's only water resource recovery facility as part of an ongoing wastewater surveillance program. Daily samples between April 6, and May 31, 2024, were processed for nucleic acid extraction within 48 hours of arrival at the laboratory using previously described methods <sup>16</sup>. Retrospective analysis of archived extracted RNA from wastewater samples collected from July 2020 to March 31, 2024 were analysed by RT-qPCR after being stored at -80°C for periods ranging from 1 to 45 months. Frequency of samples tested for retrospective analysis is detailed in Table S.1. Viral MeV was quantified using the assay described by Hummel et al. (2006), targeting the nucleoprotein <sup>17</sup>. Additional details for primers, probes and cycling conditions are summarized in supplementary information and Table S.2.

### *2.3 Sample Amplification, Purification, Sanger Sequencing and Strain Identification*

Wastewater samples showing a positive MeV detection through RT-qPCR were further analysed to identify the strain circulating in the community. For these samples, a nested-PCR approach previously described by Brzovic et al. (2022), was used to increase the sensitivity; two sequential amplification reactions were performed using two different sets of primers<sup>18</sup>. A description of the primers and cycling conditions can be found in supplementary information and Table S.2. The samples were then sequenced by Sanger sequencing of the N450 nucleotide region according to the WHO guidelines at the Ottawa Hospital's Research Institute StemCore Sequencing Facility using primers listed in Table S.3<sup>19</sup>. The sequences were compiled and edited using Snapgene Viewer version 7.2.0. Genotype and clade were determined by comparing the sequences with the NCBI Blast database of sequences and phylogenetic analysis using Genome Detective.

## **3. Results and Discussion**

### *3.1 MeV Vaccine Shedding: Detection of Measles Genotype A*

Positive MeV signal was detected in 8% of wastewater samples (11/135) (Figure 1). The first positive detection was on August 4, 2023 and was the only detection in 2023. All subsequent positive detections were in 2024. Specifically, nine of the positive detections were from the daily samples and only two positive detections were from the retrospective analysis of archived RNA samples.

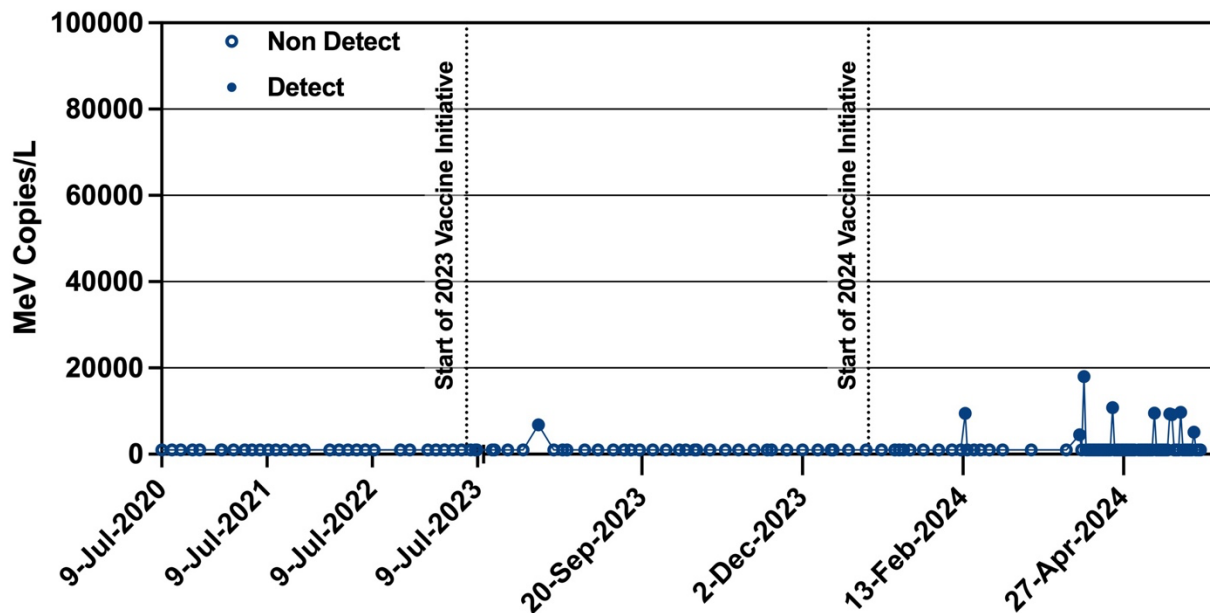

**Figure 1:** Genome copies of MeV per litre of wastewater sample from July 2020 to May 31, 2024. The open circles indicate non detects and closed circles indicate detects. The dashed lines indicate the approximate start of increased vaccination efforts by Ottawa Public Health in 2023 and in 2024.

The detection of MeV in wastewater was a public health concern in the city of Ottawa, particularly as there were no known active measles cases in the population at the time<sup>20</sup>. As such, in accordance with WHO framework, genetic characterization of MeV upon detection in wastewater was carried out to monitor virus circulation and to distinguish the virulent strain<sup>21,22</sup>. Two of the wastewater samples with positive MeV detection were Sanger sequenced for genomic analysis: wastewater samples collected on April 6, 2024 and May 22, 2024. Sequence comparison with NCBI Blast database revealed a 100% homology with the Moraten vaccine strain (NCBI Accension # AF266287) and the Schwarz vaccine strain (NCBI Accension # AB591381). Phylogenetic analysis using the measles typing tool on the Genome Detective website confirmed identification of measles genotype A (Figure S.1). According to WHO, all wildtype strains of genotype A are extinct, indicating that the detected MeV was the vaccine strain<sup>23</sup>. This study represents the first detection of MeV vaccine in North American wastewater, indicating vaccine-shedding of live-attenuated MeV. This outcome was unexpected, as most reports of MeV detections in other regions involved circulating wildtype strains<sup>13,14</sup>.

It is noted that low recovery of MeV from RNA samples stored at -80°C, from July 2020 to March 31 2024, in this study may be presented as non-detects due to viral loss during storage. Samples collected between April 6, and May 31, 2024, were not archived and instead were processed and analyzed within 48 hours of collection. Research on the effects of storage at -80°C of SARS-CoV-2 RNA from wastewater samples found no significant difference in recovery when re-quantified after 16 months storage<sup>24</sup>. However, the effects of storage on MeV RNA from wastewater has not yet been studied. Additionally, the viral signal from fresh samples was already low, consequently it is stipulated that even a small amount of decay could lead to loss of viral signal in the archived samples. Therefore, future work should be done to understand the stability of MeV RNA in wastewater.

### *3.2 Public Health Measles Vaccine Initiatives Associated with MeV Measurements in Wastewater*

The measles vaccines currently available in Ontario, Canada, and hence in the city of Ottawa, are Priorix (MMR), Proquad (MMR-Var), and MMR II (MMR). MMR II and Proquad are manufactured by Merck & Co., using the Moraten strain<sup>25</sup>. Priorix is manufactured by GlaxoSmithKline Biologicals using the Schwarz strain<sup>26</sup>. Both the Moraten and Schwarz strain were developed from the Edmonston isolate and previous analysis of the sequences of the Moraten and Schwarz strains indicated identical coding sequences belonging to MeV genotype A<sup>27,28</sup>. Research to-date indicates that vaccine shedding occurs with vaccines containing replicative viruses, such as live-attenuated viral vaccines<sup>29</sup>. This phenomenon has been demonstrated through the detection of live-attenuated viral vaccines for polio and rotavirus in wastewater<sup>30,31</sup>. Previous studies examining the shedding and persistence of MeV in vaccinated individuals has demonstrated the presence of viral RNA in urine samples 1 to 15 days post vaccination with the possibility of slow viral clearance from the body persisting for up to 100 days post vaccination<sup>32-34</sup>. Due to the strict vaccine storage and handling guidelines in Canada, the viral signal identified in the samples analysed in this study is unlikely to be due to disposal down the drain but instead is stipulated to originate from individuals recently vaccinated, as well as those who continue to shed the vaccine over extended durations

Given that 91% (10/11) of MeV detections occurred in 2024, with no signals detected in wastewater samples prior to 2023, the authors investigated vaccination data to identify factors potentially contributing to this temporal pattern. Reduced vaccination rates during the pandemic in combination with a global rise in measles cases and reduced travel restrictions has led to an increase in the number of measles cases seen in Ontario<sup>20</sup>. As of May 31, 2024, there were 23 confirmed cases of measles reported in Ontario occurring in nine different public health units; no measles cases were reported in Ottawa to date. In an effort to restore vaccine coverage post-pandemic and in response to increased measles activity in Ontario, Ottawa Public Health increased vaccination initiatives by sending automated messages via text, email or phone call to households with one or more children overdue for vaccinations. These messages, sent periodically between June and October 2023 and January and March 2024, were intended to drive families to the school clinics provided by Ottawa Public Health's Immunization Program or to primary care providers. Additionally, due to increased risk of exposure, health care workers often receive routine immunization booster shots, including MMR/MMR-Var vaccines<sup>36</sup>.

Vaccination data provided by Ottawa Public Health indicated a rise in vaccines administered in 2023 compared to previous years (2020 – 2022) (Figure 2). There was a notable delay in reporting vaccine administrations during and after the SARS-CoV-2 pandemic years. For instance, on average, only about 60% of vaccinations were reported within the same year they were administered, with remaining administrations being reported periodically in subsequent years (Figure S.2). Consequently, Ottawa Public Health may not have true, up-to-date numbers of total vaccines administered. To address the discrepancy between the date of administration and the date of reporting, the rate of vaccine administrations was calculated via the mean and standard deviation of administered vaccines that were reported the same month they were administered. This approach helps mitigate biases within the dataset and enables a more accurate comparison of the vaccination rates from 2020 to 2024. A caveat within the dataset received is that vaccine reporting is lower than usual therefore the rate of vaccine administrations may be higher than is visible in the reported data. A paired t-test with significant alpha of 0.05, revealed that vaccination rates were

significantly higher in 2023 compared to 2020, 2021, and 2022 ( $p = 5.5E-06$ ,  $p = 2.2E-09$ , and  $p = 1.1E-08$ , respectively). This increase corresponds with the increase in vaccine initiatives by Ottawa Public Health through automated messages. Vaccination rates in 2024 were also significantly higher than 2020, 2021 and 2022 ( $p = 2.5E-03$ ,  $p = 2.5E-03$ ,  $p = 3.6E-03$ , respectively). Though there was no significant increase between 2023 and 2024 ( $p = 0.17$ ), this is likely due to carry over of increased vaccine initiatives starting in 2023. The increase in vaccination rates in 2023 and 2024 aligns with the detection of MeV vaccine shedding in wastewater during the same period, reinforcing the link between heightened vaccination efforts and the observed signals (Figure 2). The minimal detections from archived wastewater RNA collected in 2023 is stipulated to be due to viral degradation during extended storage.

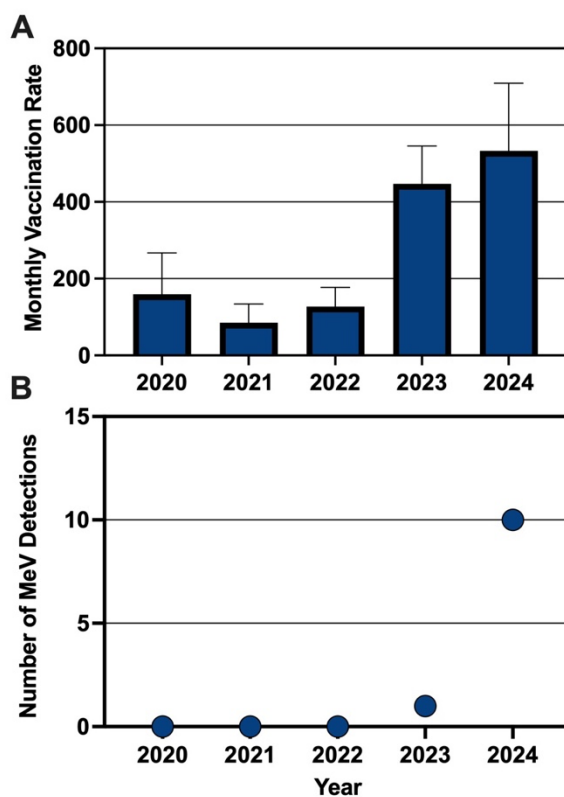

**Figure 2:** **A.** Monthly vaccination rate during the SARS-CoV-2 pandemic shown as the average number of reported vaccines administered per month from April 2020 to June 2024. **B.** Increases in monthly vaccination rates in 2023 and 2024 occur during the same periods of MeV vaccine strain detection in wastewater.



### *3.3 Measles WES and Public Health Applications*

WES has the potential to serve as an important public health tool by detecting MeV RNA in wastewater and hence identifying risk of measles transmission prior to clinical cases presenting within a community. The time from exposure to rash onset of clinical measles cases averages 14 days with patients considered infectious during the prodromal phase approximately four days before rash onset<sup>23</sup>. In Ontario individuals presenting with fever, maculopapular rash for at least three days, and at least one of: cough, coryza or conjunctivitis are suspected measles cases requiring confirmation via virus isolation (culture) or RNA detection (PCR) from a collected clinical specimen<sup>37</sup>. Only measles cases which meet criteria for confirmed case classification according to the Ontario Ministry of Health and Long-Term Care surveillance are included in reported case counts. Mild and asymptomatic cases of measles may not meet criteria and therefore may not be reported while detection of MeV in urine samples from asymptomatic individuals has been demonstrated in literature<sup>38</sup>. One of the major and enhanced applications of measles WES is to identify outbreak hotspots in the community, thereby facilitating prompt decisions to control and mitigate circulation and transmission of MeV<sup>14,39</sup>. In the event of a detected measles signal in wastewaters, public health authorities would swiftly mobilize resources, initiating urgent clinical measures, including enhanced surveillance and rapid laboratory confirmation via PCR or serology, leading to prompt isolation of suspected cases and immediate contact tracing<sup>37</sup>. These actions could be accompanied by expedited vaccination efforts to prevent further transmission due to the highly contagious nature of measles and the risk of large-scale outbreaks<sup>40</sup>. However, accurately interpreting a MeV signal in wastewater requires identifying the strain because vaccination rates and recent immunization efforts can confound results. As such, routine genotypic analysis of MeV in wastewater is essential to ensure that signals from the vaccine strain are correctly identified, allowing public health resources to be directed appropriately.

Hence, the detection of MeV signal in wastewater offers valuable insights beyond being an early warning system of measles re-emergence in a community, it can also track vaccination coverage within communities. Similar applications have been demonstrated for the live-attenuated vaccine-virus for Polio

in Sweden, Finland, and Cuba following a vaccine campaign<sup>30,41</sup>. In Canada, maintaining the elimination of endemic measles transmission relies heavily on strategies such as effective surveillance and high immunization coverage. Continual monitoring of Ottawa wastewater for MeV provides valuable insights, allowing public health officials to track re-emergence and the impact of vaccination campaigns in real-time, thus eliminating the wait for reported administrations. Given the pattern of delays in reported administrations, the clinical data would likely be outdated and may not provide the most accurate or relevant information in light of increased vaccination efforts.

This study marks a significant milestone as the first to detect and identify the vaccine strain of MeV in North American wastewater and compliments the findings of MeV vaccine strain in South Africa<sup>15</sup>. It underscores the need for routine genotypic analysis to prevent the misallocation of public health resources in response to MeV WES signals that do not pose a transmission risk. Additionally, this research highlights the potential application of MeV WES for tracking community immunization efforts in real time. The findings of this study highlights the potential of WES for other re-emergent infections to enhance outbreak preparedness, prevention, and response.

### **Acknowledgements**

The authors wish to acknowledge the help and assistance of the the City of Ottawa, Ottawa Public Health, Public Health Ontario and all their employees involved in the project during this study. Their time, facilities, resources and thoughts provided throughout the study helped the authors greatly. The authors also wish to specifically outline the assistance of the Ottawa Public Health Epidemiology and Evidence team. The authors would like to acknowledge the assistance of Dr. Alessandro Zulli from the Department of Civil and Environmental Engineering, Stanford University. The authors would like to acknowledge funding from the CIHR Applied Public Health Chair in Environment, Climate Change and One Health, awarded to Robert Delatolla.

## **Funding**

This research was supported by the CIHR Applied Public Health Research Chair in Environment, Climate Change and One Health, awarded to Dr. Robert Delatolla. The funding source had no involvement in the study design, data collection, data analysis, data interpretation, nor the writing or decision to submit the paper for publication.

## **References**

1. Furuse, Y., Suzuki, A. & Oshitani, H. *Origin of Measles Virus: Divergence from Rinderpest Virus between the 11 Th and 12 Th Centuries*. <http://beast.bio.ed.ac.uk/Tracer>. (2010).
2. Minta, A. A. *et al. Progress Toward Measles Elimination-Worldwide, 2000-2022*. (2023).
3. *WHO-UNICEF JOINT STATEMENT ON STRATEGIES TO REDUCE MEASLES MORTALITY WORLDWIDE*. (2001).
4. *Genetic Diversity of Wild-Type Measles Viruses and the Global Measles Nucleotide Surveillance Database (MeaNS)*. <http://www.who.int/im-> (2013).
5. Bellini, W. J. & Rota, P. A. Genetic diversity of wild-type measles viruses: Implications for global measles elimination programs. *Emerg Infect Dis* **4**, 29–35 (1998).
6. Papillomavirus, H. & Zoster, H. Publicly Funded Immunization Publicly funded vaccines may be provided only Schedules for Ontario – January 2021 to eligible individuals and must be free of charge. (2021).
7. Brown, K. E. *et al. Morbidity and Mortality Weekly Report Genetic Characterization of Measles and Rubella Viruses Detected Through Global Measles and Rubella Elimination Surveillance, 2016-2018*. vol. 68 <http://www.who.int/wkly-reports>. (2019).
8. Measles: For Health Professionals. <https://www.canada.ca/en/public-health/services/diseases/measles/health-professionals-measles.html>.
9. Brouwer, A. F. *et al. Epidemiology of the silent polio outbreak in Rahat, Israel, based on modeling of environmental surveillance data*. *Proc Natl Acad Sci U S A* **115**, E10625–E10633 (2018).
10. Petrinca, A. R. *et al. Presence and environmental circulation of enteric viruses in three different wastewater treatment plants*. *J Appl Microbiol* **106**, 1608–1617 (2009).
11. Moss, ( W J, Feinstone, H. & Moss, W. J. Measles. *The Lancet* **379**, 153–164 (2012).

12. Riddell, M. A., Moss, W. J., Hauer, D., Monze, M. & Griffin, D. E. Slow clearance of measles virus RNA after acute infection. *Journal of Clinical Virology* **39**, 312–317 (2007).
13. Benschop, K. S. M. *et al.* Polio and measles down the drain: Environmental enterovirus surveillance in the Netherlands, 2005 to 2015. *Appl Environ Microbiol* **83**, 558–575 (2017).
14. Rector, A., Bloemen, M., Hoorelbeke, B., Van Ranst, M. & Wollants, E. Detection of measles virus genotype D8 in wastewater of Brussels capital region, Belgium, March 2024. (2024).
15. Ndlovu, N., Mabasa, V., Sankar, C., Msomi, N. & Phalane, E. Wastewater testing during the South African 2022-2023 measles outbreak demonstrates the potential of. (2024).
16. Wong, C. H. *et al.* Rapidly developed, optimized, and applied wastewater surveillance system for real-time monitoring of low-incidence, high-impact MPOX outbreak. *J Water Health* **21**, 1264 (2023).
17. Hummel, K. B., Lowe, L., Bellini, W. J. & Rota, P. A. Development of quantitative gene-specific real-time RT-PCR assays for the detection of measles virus in clinical specimens. *J Virol Methods* **132**, 166–173 (2006).
18. Brzovic, M. *et al.* Measles cases in Split-Dalmatia County (a Croatian tourist region), in May–July 2019: outbreak report and lessons learnt. *Eur J Public Health* **32**, 948–954 (2022).
19. CDC. annex-c1-measles-genotyping-rt-pcr.
20. Health Ontario, P. Measles in Ontario 1 ENHANCED EPIDEMIOLOGICAL SUMMARY Measles in Ontario.
21. Kaic, B. *et al.* Spotlight on measles 2010: Excretion of vaccine strain measles virus in urine and pharyngeal secretions of a child with vaccine associated febrile rash illness, Croatia, March 2010. *Eurosurveillance* **15**, 1–2 (2010).
22. World Health Organisation. Genetic diversity of wildtype measles viruses and the global measles nucleotide surveillance database (MeaNS) = La diversité génétique des virus rougeoleux de type sauvage et la base de données MeaNS (Measles Nucleotide Surveillance). *Weekly Epidemiological Record* **90**, 373–380 (2015).
23. WHO. Manual for the Laboratory-based Surveillance of Measles, Rubella, and Congenital Rubella Syndrome. *WHO Library* 3–5 (2018).
24. Williams, R. C. *et al.* Examining the stability of viral RNA and DNA in wastewater: Effects of storage time, temperature, and freeze-thaw cycles. *Water Res* **259**, 121879 (2024).

25. HIGHLIGHTS OF PRESCRIBING INFORMATION - ProQuad. [www.vaers.hhs.gov](http://www.vaers.hhs.gov).
26. GlaxoSmithKline. Package Insert - PRIORIX.
27. Bankamp, B., Takeda, M., Zhang, Y., Xu, W. & Rota, P. A. Genetic characterization of measles vaccine strains. *Journal of Infectious Diseases* **204**, 533–548 (2011).
28. Parks, C. L. *et al.* Comparison of Predicted Amino Acid Sequences of Measles Virus Strains in the Edmonston Vaccine Lineage. *J Virol* **75**, 910–920 (2001).
29. Armas, F. *et al.* Contextualizing Wastewater-Based surveillance in the COVID-19 vaccination era. *Environ Int* **171**, 107718 (2023).
30. Lago, P. M. *et al.* Poliovirus detection in wastewater and stools following an immunization campaign in Havana, Cuba. *Int J Epidemiol* **32**, 772–777 (2003).
31. Ito, E. *et al.* Detection of Rotavirus Vaccine Strains in Oysters and Sewage and Their Relationship with the Gastroenteritis Epidemic. *Appl Environ Microbiol* **87**, 1–9 (2021).
32. Eckerle, I. *et al.* Nonfebrile seizures after mumps, measles, rubella, and varicella-zoster virus combination vaccination with detection of measles virus RNA in serum, throat, and urine. *Clinical and Vaccine Immunology* **20**, 1094–1096 (2013).
33. McMahon, J., Mackay, I. M. & Lambert, S. B. Measles Vaccine Virus RNA in Children More Than 100 Days after Vaccination. (2019) doi:10.3390/v11070636.
34. Rota, P. A. *et al.* Detection of measles virus RNA in urine specimens from vaccine recipients. *J Clin Microbiol* **33**, 2485–2488 (1995).
35. Public Health Unit. Vaccine Storage and Handling Guidelines. *Ontario* 1–24 (2018).
36. Ontario. Provincial Infectious Diseases Advisory Committee. & Public Health Ontario. *Routine Practices and Additional Precautions in All Health Care Settings*. (2012).
37. Ontario Public Health Standards. Appendix 1 : Case Definitions and Disease- Specific Information. 1–13 (2022).
38. Vardas, E. & Kreis, S. Isolation of measles virus from a naturally-immune, asymptotically re-infected individual. *Journal of Clinical Virology* **13**, 173–179 (1999).
39. Benschop, K. S. M. *et al.* Polio and measles down the drain: Environmental enterovirus surveillance in the Netherlands, 2005 to 2015. *Appl Environ Microbiol* **83**, 558–575 (2017).
40. Ramsay, L. C. *et al.* Cost-effectiveness of measles control during elimination in Ontario, Canada, 2015. *Eurosurveillance* **24**, 1–11 (2019).

41. Poyry, T., Stenvik, M. & Hovi, T. Viruses in sewage waters during and after a poliomyelitis outbreak and subsequent nationwide oral poliovirus vaccination campaign in Finland. *Appl Environ Microbiol* **54**, 371–374 (1988).
